# Supplementary material for: Field trial of medicinal plant, Bidens pilosa, against eimeriosis in broilers
Source: PubMed Central journal article supplement (PMC4838822; doi:10.1038/srep24692), 2016-04-21
Supplement: srep24692-s1.pdf [file srep24692-s1.pdf]

# Supplementary Information

## Field trial of medicinal plant, *Bidens pilosa*, against eimeriosis in broilers

Cicero Lee-Tian Chang<sup>1</sup>, Cheng-Ying Yang<sup>2,3</sup>, Thangarasu Muthamilselvan<sup>2\*</sup> and Wen-Chin Yang<sup>2,3,4,5\*</sup>

### S1A

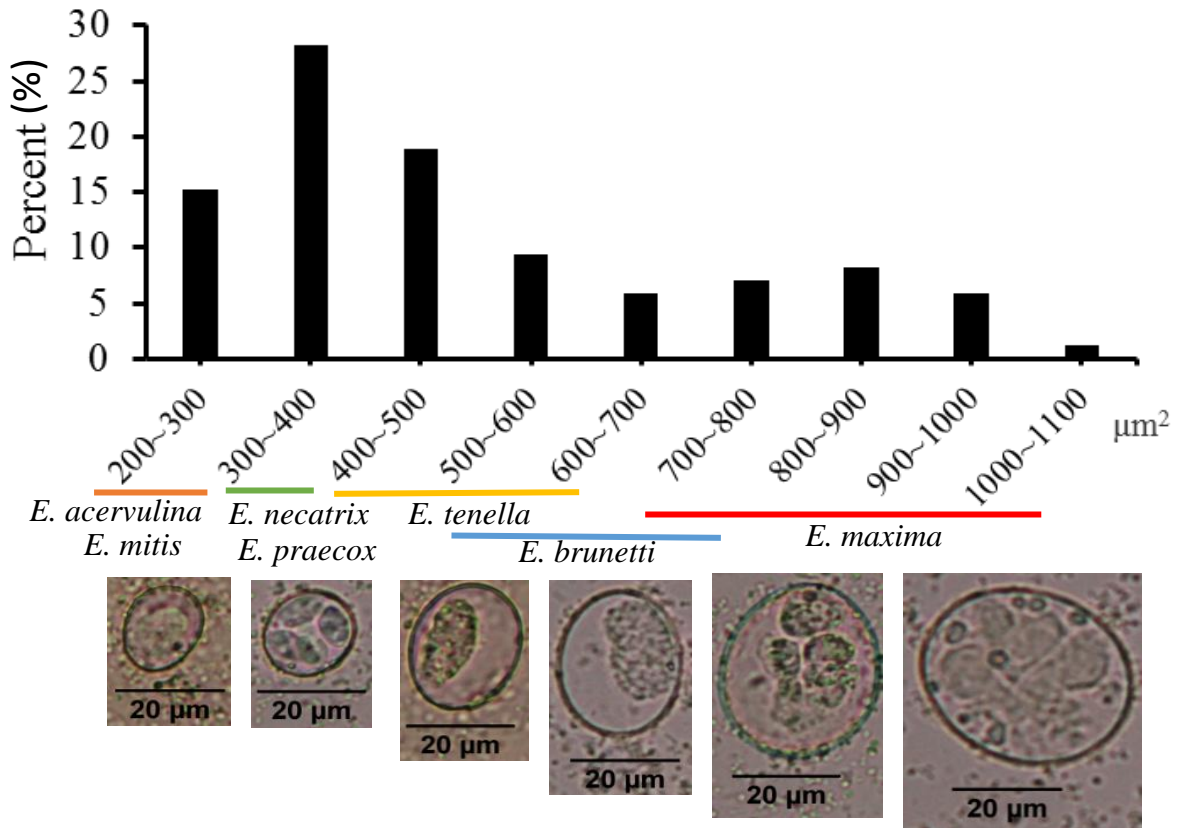

### S1B

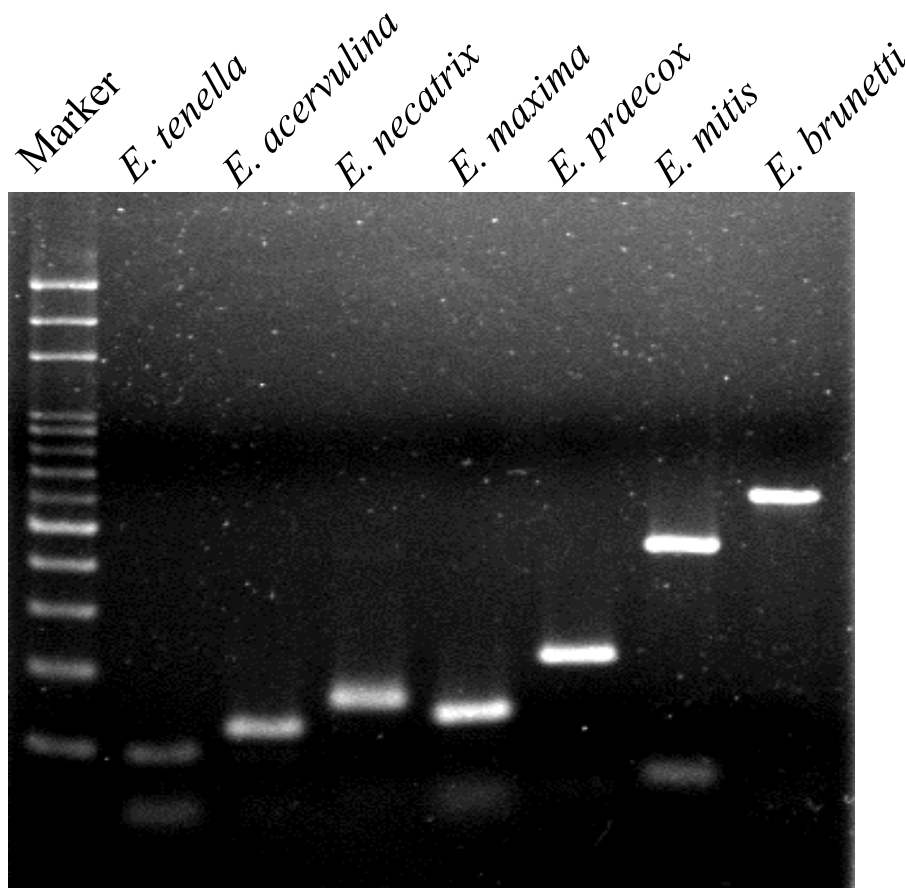

# S1C

| Species              | Base pairs | Primer set                     |
|----------------------|------------|--------------------------------|
| <i>E. tenella</i>    | 121 bp     | TCGTCTTTGGCTGGCTATTC           |
|                      |            | CAGAGAGTCGCCGTCACAGT           |
| <i>E. acervulina</i> | 124 bp     | CTCGCGTGTTCAGCACTACAT          |
|                      |            | GATACGCTGCTTTGCCTTTC           |
| <i>E. necatrix</i>   | 141 bp     | AACGCCGGTATGCCTCGTCG           |
|                      |            | GTACTGGTGCCAACGGAGA            |
| <i>E. maxima</i>     | 138 bp     | TCGTTGCATTCGACAGATTC           |
|                      |            | TAGCGACTGCTCAAGGGTTT           |
| <i>E. praecox</i>    | 278 bp     | CATCGGAATGGCTTTTTGAAAGCG       |
|                      |            | GCATGCGCTAACAACCTCCCCTT        |
| <i>E. mitis</i>      | 460 bp     | AGTCAGCCACCAGTAGAGCCAATATTT    |
|                      |            | AGTCAGCCACAAACAAATTCAAACCTCTAC |
| <i>E. brunetti</i>   | 626 bp     | TGGTCGCAGAACCTACAGGGGCTGT      |
|                      |            | TGGTCGCAGACGTATATTAGGGGTCTG    |

**Sup. Fig. S1.** Characterization of *Eimeria* species on the poultry farm. Feces were collected from the poultry farm before the field trial. (A) The oocysts were collected from stool samples, examined under a microscope and counted. Their composition and photographs are shown. (B-C) DNA from the oocysts (A) was extracted. The DNA was used as a template to perform polymerase chain reaction in the presence of 7 primer sets of *Eimeria* species (C). The PCR products and DNA markers were analysed using DNA gel electrophoresis. Their representative image is indicated (B).

**Supplementary Table S1. Proximate composition and gross energy of the feed used in the study.**

|                               | Percentage of <i>B. pilosa</i> <sup>a</sup> in diets <sup>a</sup> |              |              |
|-------------------------------|-------------------------------------------------------------------|--------------|--------------|
|                               | 0% BP                                                             | 0.025% BP    | 0.05% BP     |
| <b>Crude protein (%)</b>      | <b>20.80</b>                                                      | <b>20.75</b> | <b>20.70</b> |
| <b>Crude fat (%)</b>          | <b>7.39</b>                                                       | <b>7.37</b>  | <b>7.35</b>  |
| <b>Ash (%)</b>                | <b>4.54</b>                                                       | <b>4.53</b>  | <b>4.52</b>  |
| <b>Crude fiber (%)</b>        | <b>2.61</b>                                                       | <b>2.60</b>  | <b>2.60</b>  |
| <b>Carbohydrate (%)</b>       | <b>52.79</b>                                                      | <b>52.91</b> | <b>53.03</b> |
| <b>Gross Energy (kcal/kg)</b> | <b>3100</b>                                                       | <b>3092</b>  | <b>3085</b>  |
| <b>CP<sup>b</sup> (µg/kg)</b> | <b>0</b>                                                          | <b>14.3</b>  | <b>28.5</b>  |

<sup>a</sup>Composition of standard diet (0% BP) and standard diet containing 0.025% and *B. pilosa* extract (0.05% BP) *B. pilosa* extract, respectively.

<sup>b</sup>Cytopioyne (CP) content of different diets was determined based on HPLC chromatography.
